# Supplementary material for: The Analysis of Vertical Transaction Behavior and Performance Based on Automobile Brand Trust in Supply Chain
Source: Hindawi journal article supplement (doi:10.1155/2016/4793851), 2016-01-01
Supplement: f1 [file 4793851.f1.csv]

res_id	status	¸öÈËÐÅÏ¢		ÆóÒµÐÅÏ¢			ÆóÒµÔ±¹¤ÈËÊý£º£¨£©;	ÆóÒµ³ÉÁ¢Ê±¼ä£º£¨£©;	ÄúÔÚ±¾ÆóÒµµ£ÈÎµÄÖ°ÎñÊÇ£º	¹ó¹«Ë¾µÄÐÔÖÊÎª£¨£©	¹ó¹«Ë¾ÔÚÕû¸öÆû³µ¹©Ó¦Á´ÖÐ³äµ±µÄ½ÇÉ«£¨£©								¹ó¹«Ë¾µÄÃ¿ÄêÏúÊÛ¶î´óÔ¼Îª£¨ÈËÃñ±Ò/Ôª£©	¹ó¹«Ë¾ÊÇ·ñÓÐ×ÔÖ÷Æ·ÅÆ²úÆ·£¿£¨£©	ÒÔÏÂÊÇÄúºÍÄúÖ÷ÒªºÏ×÷ÆóÒµµÄ¹ØÏµ·½ÃæµÄÃèÊö£¬ÇëÔÚ±í¸ñÄÚ´òÉÏºÏÊÊµÄ·ÖÊýÀ´±í´ïÄú¶Ô¸÷¸ö³ÂÊöµÄÍ¬Òâ³Ì¶È¡£								ÒÔÏÂÊÇÄúºÍÄúÖ÷ÒªºÏ×÷ÆóÒµµÄÐÅÏ¢·½ÃæµÄÃèÊö£¬ÇëÔÚ±í¸ñÄÚ´òÉÏºÏÊÊµÄ·ÖÊýÀ´±í´ïÄú¶Ô¸÷¸ö³ÂÊöµÄÍ¬Òâ³Ì¶È¡£					ÒÔÏÂÊÇÄúºÍÄúÖ÷ÒªºÏ×÷ÆóÒµµÄ×¨ÓÃ×Ê²úÍ¶×ÊµÄÃèÊö£¬ÇëÔÚ±í¸ñÄÚ´òÉÏºÏÊÊµÄ·ÖÊýÀ´±í´ïÄú¶Ô¸÷¸ö³ÂÊöµÄÍ¬Òâ³Ì¶È¡£					ÒÔÏÂÊÇÄúºÍÄúÖ÷ÒªºÏ×÷ÆóÒµµÄÁªºÏÐÐ¶¯µÄÃèÊö£¬ÇëÔÚ±í¸ñÄÚ´òÉÏºÏÊÊµÄ·ÖÊýÀ´±í´ïÄú¶Ô¸÷¸ö³ÂÊöµÄÍ¬Òâ³Ì¶È¡£					ÒÔÏÂÊÇÄúºÍÄúÖ÷ÒªºÏ×÷ÆóÒµµÄºÏ×÷¼¨Ð§µÄÃèÊö£¬ÇëÔÚ±í¸ñÄÚ´òÉÏºÏÊÊµÄ·ÖÊýÀ´±í´ïÄú¶Ô¸÷¸ö³ÂÊöµÄÍ¬Òâ³Ì¶È¡£
		;ÐÕÃû£¨×ÔÔ¸£¬¿É²»Ìî£©	;ÏÖÈÎÖ°Î»	ÆóÒµÃû³Æ£º	µØÖ·£º	¹«Ë¾ÍøÖ·£º;;;;;;;;;;;;;;;;;;;;					A£®Õû³µ×°ÅäÆóÒµ;;	B.;ÎªÆû³µÌá¹©´«¶¯ÏµÍ³ÒÔ¼°ÄÚÊÎÏµÍ³µÈÕûÌ×ÏµÍ³µÄÒ»¼¶(ÏµÍ³)¹©Ó¦ÉÌ;;	C.;ÎªÆû³µ¸÷ÏµÍ³Ìá¹©¹Ø¼ü²¿¼þµÄ¶þ»ø¹©Ó¦ÉÌ;;	D.;Îª¶þ¼¶¹©Ó¦ÉÌÌá¹©Áã¼þµÄÈý¼¶¹©Ó¦ÉÌ;	E.;ÎªÈý¼¶¹©Ó¦ÉÌÌá¹©»ù±¾Ô­²ÄÁÏ¼°Éú²ú¸¨ÁÏµÄËÄ¼¶¹©Ó¦ÉÌ;	F.;ÏúÊÛÉÌ;	G.Î¬ÐÞ·þÎñÉÌ;	H.ÆäËû			1¡¢Èç¹ûºÏ×÷ÆóÒµ²»ÂÄÐÐÓëÎÒÃÇÇ©¶©µÄºÏÍ¬£¬ºÏ×÷ÆóÒµµÄÊÐ³¡¼°ÐÐÒµÐÅÓþ»áÊÜµ½ÑÏÖØÓ°Ïì£¬¶øÇÒ±ØÐë³Ðµ£ÖØ´óµÄ¾­¼ÃËðÊ§¡£	<p;align='left'>2¡¢ÎÒÃÇÏàÐÅºÏ×÷ÆóÒµ»áÑÏ¸ñÂÄÐÐºÏÍ¬</p>	<p;align='left'>3¡¢ºÏ×÷ÆóÒµµÄÄÜÁ¦ÖµµÃÐÅÀµ£¬ÎÒÃÇÏàÐÅËüÃÇÄÜ¹»Ê¤ÈÎÄ¿Ç°µÄ¹¤×÷ÈÎÎñ</p>	<p;align='left'>4¡¢ÎÒÃÇÏàÐÅÎÒÃÇµÄºÏ×÷»ï°éÄÜ¸øÎÒÃÇ´øÀ´ÀûÈó</p>	<p;align='left'>5¡¢ÎÒÃÇÔ¸ÒâºÍÏÖÔÚµÄºÏ×÷ÆóÒµ½øÐÐ³¤ÆÚºÏ×÷</p>	<p;align='left'>6¡¢ÎÒÃÇÏàÐÅºÏ×÷ÆóÒµ²»»áÀûÓÃÎÒÃÇµÄÎÊÌâÈ¥»ñÈ¡ÀûÈó</p>	<p;align='left'>7¡¢ÎÒÃÇÏàÐÅºÏ×÷ÆóÒµÔÚÖÆ¶¨ÖØ´ó¾ö²ßµÄ¿¼ÂÇÎÒÃÇµÄÀûÒæ</p>	<p;align='left'>8¡¢¼´Ê¹ÓÐ¸ü¶à¸ü¼ÑÑ¡Ôñ£¬ÎÒÃÇÏàÐÅºÏ×÷ÆóÒµÒ²²»»á·ÅÆúÎÒÃÇºÍÆäËû¹«Ë¾½»Ò×</p>	1¡¢ºÏ×÷Ë«·½½øÐÐÁËºÜºÃµÄ¶©µ¥ÐÅÏ¢¹²Ïí	2¡¢ºÏ×÷Ë«·½½øÐÐÁËºÜºÃµÄÐèÇóÐÅÏ¢¹²Ïí	<p;align='left'>3¡¢ºÏ×÷Ë«·½½øÐÐÁËºÜºÃµÄ²úÆ·ÑÐ·¢ÐÅÏ¢¹²Ïí</p>	4¡¢ºÏ×÷Ë«·½½øÐÐÁËºÜºÃµÄ¿â´æÐÅÏ¢¹²Ïí	<p;align='left'>5¡¢ºÏ×÷Ë«·½½øÐÐÁËºÜºÃµÄÉú²ú¼Æ»®ÐÅÏ¢¹²Ïí</p>	<p;align='left'>1¡¢ºÏ×÷ÆóÒµÒâÔ¸½øÐÐ×¨ÓÃÊµÎï×Ê²úÍ¶×Ê£¬ÈçÆóÒµÎªÁËºÏ×÷Í¶Èë×¨ÃÅµÄÅäËÍÖÐÐÄ£¬Éú²úºÍ·þÎñ²úËù£¬Æ÷²ÄºÍÉè±¸¡£</p>	<p;align='left'>2¡¢ºÏ×÷ÆóÒµÒâÔ¸½øÐÐ×¨ÓÃ¹ÜÀí×Ê²úÍ¶×Ê£¬ÈçºÏ×÷ÆóÒµ½«×ÔÉíÏÈ½øµÄÉú²úÁ÷³ÌºÍ¹ÜÀíÀíÄî´øµ½¹©Ó¦Á´ÖÐ£¬ÎªÎ¬»¤¹©Ó¦Á´½øÐÐµÄ¹ÜÀí¡£</p>	<p;align='left'>3¡¢ºÏ×÷ÆóÒµÒâÔ¸½øÐÐ×¨ÓÃÈËÁ¦×Ê²úÍ¶×Ê£¬Èç¹«Ë¾ÎªºÏ×÷Í¶Èë´óÁ¿µÄ×¨Òµ¼¼ÊõÈËÔ±£¬¹ÜÀíÈËÔ±ºÍÏúÊÛÈËÔ±¡£</p>	<p;align='left'>4¡¢ºÏ×÷ÆóÒµÒâÔ¸½øÐÐ×¨ÓÃÆ·ÅÆ×Ê²úÍ¶×Ê£¬ÈçºÏ×÷ÆóÒµÎª¹©Ó¦Á´Ìá¹©ÁËÉÌ±ê¡¢Æ·ÅÆ¡¢×¨ÀûµÈÎÞÐÎ×Ê²ú;</p>	<p;align='left'>5¡¢ºÏ×÷ÆóÒµÒâÔ¸½øÐÐ×¨ÓÃ¹ØÏµ×Ê²úÍ¶×Ê£¬ÈçºÏ×÷ÆóÒµ¶ÔÎ¬»¤ºÏ×÷¹ØÏµµÄÍ¶×Ê¡£</p>	<p;align='left'>1¡¢ºÏ×÷Ë«·½Ö®¼ä¹²Í¬ÖÆ¶¨¡¢×éÖ¯ºÍÊµÊ©²úÆ·µÄÔÂ¶È¼Æ»®¡¢³¤ÆÚ¹æ»®</p>	<p;align='left'>2¡¢ºÏ×÷Ë«·½Ö®¼ä¹²Í¬Ô¤²â²úÆ·Äê¶ÈÐèÇó</p>	<p;align='left'>3¡¢ºÏ×÷Ë«·½Ö®¼ä¹²Í¬½â¾öÒµÎñÎÊÌâ</p>	<p;align='left'>4¡¢ºÏ×÷Ë«·½Ö®¼ä½¨Á¢ÏµÍ³µÄ³åÍ»½â¾ö»úÖÆ</p>	<p;align='left'>5¡¢ºÏ×÷Ë«·½Ö®¼ä¹²Í¬Å¬Á¦£¬ÁªºÏ½øÐÐ²úÆ·ÑÐ·¢</p>	<p;align='left'>Í¨¹ýºÏ×÷£¬¹ó¹«Ë¾µÄÓ¯ÀûÄÜÁ¦ÏÔÖøÌá¸ß</p>	<p;align='left'>Í¨¹ýºÏ×÷£¬¹ó¹«Ë¾µÄ×ÔÖ÷Æ·ÅÆÑÐ·¢ÄÜÁ¦Ã÷ÏÔÌá¸ß</p>	<p;align='left'>Í¨¹ýºÏ×÷£¬¹ó¹«Ë¾µÄ¹ÜÀíË®Æ½ÓÐÃ÷ÏÔÌá¸ß</p>	<p;align='left'>Í¨¹ýºÏ×÷£¬¹ó¹«Ë¾µÄÊÐ³¡·Ý¶îÏÔÖøÔö¼Ó</p>	<p;align='left'><span;style='font-size:12px;>Í¨¹ýºÏ×÷£¬¹ó¹«Ë¾µÄ×éÖ¯´´ÐÂ</span><span;style='font-size:12px;>ÄÜÁ¦</span><span;style='font-size:12px;>¡¢</span><span;style='font-family:ËÎÌå;font-size:12px;mso-ascii-font-family:'Times;New;Roman';mso-hansi-font-family:'Times;New;Roman';mso-bidi-font-family:'Times;New;Roman';mso-font-kerning:1.0pt;mso-ansi-language:EN-US;mso-fareast-language:ZH-CN;mso-b…	<p;align='left'>Í¨¹ýºÏ×÷£¬¹ó¹«Ë¾µÄ²úÆ·½»¸¶µÄ¼°Ê±ÐÔÓëÁé»îÐÔÏÔÖøÌá¸ß</p>
		Q1__A1	Q1__A2	Q2__A1	Q2__A2	Q2__A3	Q3	Q4	Q5	Q6	Q7__A1	Q7__A2	Q7__A3	Q7__A4	Q7__A5	Q7__A6	Q7__A7	Q7__A8	Q8	Q9	Q25__R1	Q25__R2	Q25__R3	Q25__R4	Q25__R5	Q25__R6	Q25__R7	Q25__R8	Q26__R1	Q26__R2	Q26__R3	Q26__R4	Q26__R5	Q27__R1	Q27__R2	Q27__R3	Q27__R4	Q27__R5	Q28__R1	Q28__R2	Q28__R3	Q28__R4	Q28__R5	Q29__R1	Q29__R2	Q29__R3	Q29__R4	Q29__R5	Q29__R6
228892	1						2	2	3	1	0	1	0	0	0	0	0	0	2	1	6	6	1	1	1	1	1	1	1	1	1	1	1	1	1	1	1	1	4	1	1	1	1	1	1	1	1	1	1
229106	2						2	3	2	4	0	0	1	0	0	0	0	0	3	2	4	6	5	7	6	4	2	4	2	3	2	4	6	4	4	4	4	4	4	4	4	4	4	4	4	4	4	4	4
229187	3						2	3	2	4	0	1	0	0	0	0	0	0	2	2	6	6	6	6	6	6	6	6	6	6	6	6	6	6	6	6	6	6	6	6	6	6	6	4	6	5	5	5	6
229642	4						2	3	4	3	0	1	0	0	0	0	0	0	2	2	7	5	6	6	6	5	1	1	6	5	4	1	5	6	6	6	6	6	6	6	6	6	6	1	6	6	1	6	6
229661	5						2	1	4	4	0	1	0	0	0	0	0	0	2	1	6	6	6	6	6	6	6	6	6	6	6	6	6	4	6	6	6	6	7	7	7	7	7	6	7	6	6	6	6
232338	6						2	3	3	4	0	0	1	0	0	0	0	0	3	1	4	6	6	6	6	6	6	6	6	6	6	6	6	4	6	6	4	6	6	4	6	6	6	6	6	6	6	6	6
232585	7						1	1	3	1	0	1	0	0	0	0	0	0	3	2	4	4	4	4	4	4	4	4	5	4	2	3	4	4	4	4	3	4	4	6	5	5	5	4	4	4	3	4	4
232683	8						2	3	2	4	0	1	0	0	0	0	0	0	2	1	6	6	6	6	6	6	6	6	6	6	6	6	6	6	6	5	6	6	6	6	6	6	6	6	6	6	6	6	6
233027	9						2	3	1	1	0	0	1	0	0	0	0	0	2	1	5	6	6	5	6	6	6	4	6	5	4	5	6	4	6	4	2	5	4	3	6	5	6	6	5	6	7	6	7
233275	10						2	3	3	4	0	1	0	0	0	0	0	0	3	1	6	6	6	6	6	5	5	4	4	4	3	4	4	4	4	4	4	4	4	4	4	4	4	5	5	5	5	5	5
233334	11						3	3	3	4	0	1	0	0	0	0	0	0	3	1	7	6	6	6	7	6	6	5	7	6	5	6	6	6	6	6	5	6	6	5	5	6	5	6	5	5	5	6	6
234098	12						2	3	2	1	0	1	0	0	0	0	0	0	2	1	6	7	6	6	6	6	5	5	6	6	6	6	6	6	6	6	6	6	6	6	7	6	7	6	6	6	5	6	6
235969	13						2	2	2	2	0	0	0	1	1	0	0	0	2	1	2	3	2	2	3	3	2	3	2	3	3	3	2	2	3	2	3	3	3	3	2	2	4	3	3	2	2	3	3
240039	14						3	2	2	4	0	1	1	0	0	0	0	0	2	1	2	7	7	6	7	7	7	6	7	7	7	7	7	7	7	7	7	7	7	7	7	7	7	5	7	7	7	7	7
240041	15						3	2	1	4	0	0	1	0	0	0	0	0	2	1	6	6	6	6	6	5	5	4	6	6	6	6	5	6	6	5	6	5	6	5	6	6	5	5	6	6	6	6	5
240263	16						3	2	1	4	0	1	0	0	0	0	0	0	2	1	6	7	6	6	6	6	6	6	6	6	5	6	6	6	6	6	6	6	5	5	6	6	6	5	5	6	6	6	6
240394	17						3	1	3	4	0	1	0	0	0	0	0	0	2	1	6	6	7	6	7	6	6	6	6	7	6	6	6	6	6	5	6	6	6	6	6	6	6	6	6	6	7	6	5
240468	18						2	1	2	4	0	1	0	0	0	0	0	0	2	1	7	7	7	7	7	6	6	4	7	7	7	7	7	7	7	7	7	7	7	7	7	7	7	7	7	7	7	7	7
240553	19						1	3	1	1	0	0	1	0	0	0	0	0	2	2	6	6	6	6	6	6	6	6	6	6	6	6	6	6	6	6	6	6	6	6	6	6	6	5	5	5	5	5	5
240862	20						2	2	2	4	0	1	1	0	0	0	0	0	2	1	5	4	5	4	6	4	4	6	6	6	5	6	6	5	5	6	6	6	5	5	6	5	6	2	6	6	5	5	6
241018	21						2	2	3	4	0	1	0	0	0	0	0	0	2	1	6	6	7	6	6	6	6	6	6	6	6	6	6	6	6	6	6	6	6	5	7	6	6	6	6	5	6	6	5
241193	22						2	1	1	4	0	1	0	0	0	0	0	0	2	2	5	6	5	4	5	4	5	5	5	5	5	4	4	5	5	5	4	5	4	5	5	4	6	5	5	4	5	5	5
241296	23						2	2	2	4	0	0	1	0	0	0	0	0	3	1	7	6	6	6	6	6	6	6	6	6	6	6	6	6	6	6	6	6	6	6	6	6	6	6	6	6	6	6	6
241583	24						2	2	1	4	0	1	0	0	0	0	0	0	2	1	7	6	6	5	6	4	5	4	6	6	4	5	6	5	6	5	5	5	6	6	6	6	6	6	6	5	6	6	5
241602	25						2	2	1	4	0	1	0	0	0	0	0	0	2	1	6	6	6	6	6	6	6	6	6	6	6	6	6	6	6	6	6	6	6	6	6	6	6	6	5	5	5	5	6
241861	26						3	2	2	4	0	1	0	0	0	0	0	0	2	2	7	6	6	6	5	6	6	6	6	6	6	6	6	5	6	4	5	6	6	6	5	6	6	5	4	5	6	5	5
243479	27						2	3	2	4	0	1	0	0	0	0	0	0	2	2	6	6	6	6	7	4	4	6	5	5	5	4	6	6	4	4	4	5	5	5	6	4	7	5	5	5	5	5	5
243798	28						2	1	1	4	0	1	0	0	0	0	0	0	2	1	5	6	6	6	6	6	5	4	4	4	4	4	4	5	5	5	5	5	5	5	5	5	5	5	5	5	6	5	6
243799	29						2	1	1	4	0	1	0	0	0	0	0	0	2	1	4	5	7	6	7	4	4	1	6	4	5	5	6	5	4	2	2	4	4	2	4	4	5	5	4	4	5	4	5
244708	30						3	3	2	4	0	1	0	0	0	0	0	0	3	2	6	7	6	6	7	5	5	4	6	5	5	5	6	6	6	5	3	5	6	5	5	4	5	5	5	4	4	4	4
245125	31						3	3	2	4	1	0	0	0	0	0	0	0	3	1	3	6	6	6	6	6	5	4	6	6	4	4	4	4	4	4	4	4	4	5	6	5	5	4	4	4	4	4	4
245151	32						3	3	2	4	0	1	0	0	0	0	0	0	3	1	6	5	5	5	6	6	5	2	4	4	4	3	4	5	5	5	5	5	5	4	5	4	4	4	4	5	5	5	6
245155	33						3	3	1	4	0	1	0	0	0	0	0	0	3	1	7	7	7	7	7	6	6	6	7	7	7	7	7	7	7	7	7	7	7	7	7	6	6	6	6	6	6	6	6
245172	34						3	3	1	4	0	1	0	0	0	0	0	0	3	2	7	6	6	6	6	6	4	6	5	5	6	5	5	6	5	6	5	6	6	4	5	5	6	4	5	4	4	4	4
245207	35						3	3	1	4	0	1	0	0	0	0	0	0	3	1	6	6	6	6	6	6	5	6	6	6	6	6	6	6	6	6	5	5	6	6	6	6	6	5	6	6	5	6	6
245349	36						3	3	2	1	0	1	0	0	0	0	0	0	3	2	7	7	6	6	6	6	5	6	6	6	6	6	6	6	6	6	6	6	6	6	6	6	6	6	6	6	6	6	6
245532	37						3	3	1	4	0	1	0	0	0	0	0	0	3	2	6	6	6	4	5	5	5	6	6	6	6	6	6	6	6	6	6	6	6	6	6	6	6	5	5	5	6	5	6
245892	38						3	3	1	4	0	1	0	0	0	0	0	0	3	2	6	6	5	6	5	4	4	3	7	6	6	7	7	5	6	6	5	6	6	6	6	5	4	6	5	6	5	4	5
246034	39						2	2	2	6	0	1	0	0	0	0	0	0	2	2	6	6	6	6	6	6	4	2	6	6	4	6	4	6	7	6	6	6	4	4	6	4	6	5	4	5	6	6	6
246039	40						2	3	3	4	0	1	0	0	0	0	0	0	2	1	6	3	4	3	4	2	2	1	3	4	4	4	2	4	5	3	4	4	4	3	6	6	5	5	4	5	4	4	5
246108	41						2	3	3	4	0	1	0	0	0	0	0	0	2	2	4	4	4	5	5	4	5	4	5	5	4	4	5	5	4	4	4	4	5	4	5	4	5	4	4	4	4	4	5
246233	42						1	2	4	4	0	1	0	0	0	0	0	0	2	1	2	5	6	6	6	5	5	2	6	6	6	6	6	6	6	6	5	4	6	6	6	7	7	6	6	6	6	6	7
246549	43						2	3	2	1	0	1	0	0	0	0	0	0	3	1	6	6	6	6	6	6	6	6	6	6	6	6	6	6	6	6	6	6	6	6	6	6	6	6	6	6	6	6	6
247016	44						2	3	1	1	0	1	0	0	0	0	0	0	3	1	2	6	6	6	6	6	6	6	6	6	6	6	6	6	6	6	6	6	6	6	6	6	6	6	6	6	6	6	6
248498	45						2	3	3	4	0	1	0	0	0	0	0	0	2	1	6	6	5	5	6	4	4	4	5	5	5	5	5	6	5	5	4	6	6	6	6	5	5	5	5	4	5	5	5
251713	46						3	3	2	4	1	1	0	0	0	0	0	0	3	1	4	6	6	6	6	3	4	4	4	4	4	4	4	5	5	5	4	4	4	5	5	4	4	5	4	4	4	4	4
	47						2	3	1	4	0	1	1	0	0	0	0	0	2	1	4	6	6	5	6	1	1	1	6	6	4	6	6	4	4	4	4	4	2	2	6	2	2	4	4	4	4	4	4
	48						2	3	1	4	0	1	1	0	0	0	0	0	3	1	6	5	5	5	6	4	4	4	5	5	4	4	6	4	4	4	4	4	4	4	4	4	4	4	4	4	4	4	4
	49						2	3	3	4	0	1	1	0	0	0	0	0	3	1	7	6	7	7	6	5	4	4	5	5	5	5	6	5	5	6	6	6	6	6	6	4	4	4	6	5	4	4	6
	50						2	3	2	4	0	1	1	0	0	0	0	0	3	1	2	6	6	6	6	6	6	4	4	6	5	4	3	6	6	6	4	5	4	5	4	4	5	5	4	5	5	4	4
	51						2	3	1	4	0	1	1	0	0	0	0	0	3	1	7	7	5	5	5	1	4	1	7	7	7	7	7	5	5	5	6	6	7	6	5	7	7	3	4	5	5	6	6
	52						2	3	1	4	0	1	1	0	0	0	0	0	3	1	2	6	6	6	6	6	6	4	4	5	4	4	3	6	6	6	4	5	4	5	4	5	5	5	4	5	5	4	4
	53						2	3	1	4	0	1	1	0	0	0	0	0	3	1	7	7	7	7	7	7	7	5	7	7	7	5	5	6	6	6	5	6	4	4	6	4	5	6	5	5	5	5	5
	54						2	3	1	4	0	1	1	0	0	0	0	0	3	1	7	7	7	7	7	7	7	7	7	7	7	7	7	7	7	7	7	7	7	7	7	7	7	7	7	7	6	7	7
55 2 3 3 4 0 1 1 0 0 0 0 0 3 1 7 6 6 6 6 6 6 6 6 6 6 6 6 6 6 6 6 6 6 6 6 6 6 6 6 6 6 6 6 6 "Ç©¶©ºÏÀíÓÐÐ§µÄ½»Ò×ºÏÍ¬,±£³ÖÁ¼ºÃµÄ½»Ò×»ï°é¹ØÏµ,Òª¿¼ÂÇË«·½ÀûÒæ,ÊµÏÖË«Ó®.";;;;;;;;;;;;;;;;;;;;;;;;;;;;;;;;;;;;;;;;;;;;;;;;;;;;;;;;;;;;;;;;;;;;;;;;;;;;;;;;;;;;;;;;
																					5.436363636	5.872727273	5.745454545	5.6	5.854545455	5.072727273	4.872727273	4.454545455	5.490909091	5.472727273	5.109090909	5.181818182	5.363636364	5.327272727	5.436363636	5.218181818	4.981818182	5.327272727	5.327272727	5.127272727	5.545454545	5.2	5.454545455	4.963636364	5.109090909	5.109090909	5.072727273	5.127272727	5.309090909
																					5.363636364								5.323636364					5.258181818					5.330909091					5.137662338
[truncated: 2 more columns]
